# Supplementary material for: Sensitive electrochemical determination of rhodamine B based on cyclodextrin-functionalized nanogold/hollow carbon nanospheres
Source: Royal Society of Chemistry journal article supplement (doi:10.1039/c5ay00654f), 2015-01-01
Supplement: c5ay00654f1.pdf [file c5ay00654f1.pdf]

## **Electronic Supplementary Information**

### **Sensitive Electrochemical Determination of Rhodamine B Based on Cyclodextrin-Functionalized Nanogold/Hollow Carbon Nanospheres**

Yinhui Yi,<sup>†</sup> Heng Sun,<sup>†</sup> Gangbing Zhu,<sup>†,‡,\*</sup> Zhen Zhang,<sup>†</sup> Xiangyang Wu<sup>†</sup>

<sup>†</sup>School of the Environment and Safety Engineering, Collaborative Innovation Center of Technology and Material of Water Treatment, Jiangsu University, Zhenjiang, 212013, P.R.China

<sup>‡</sup>State Key Laboratory of Chemo/Biosensing and Chemometrics, Hunan University, Changsha, 410082, P.R.China

---

\* E-mail address: [zhgb1030@ujs.edu.cn](mailto:zhgb1030@ujs.edu.cn)

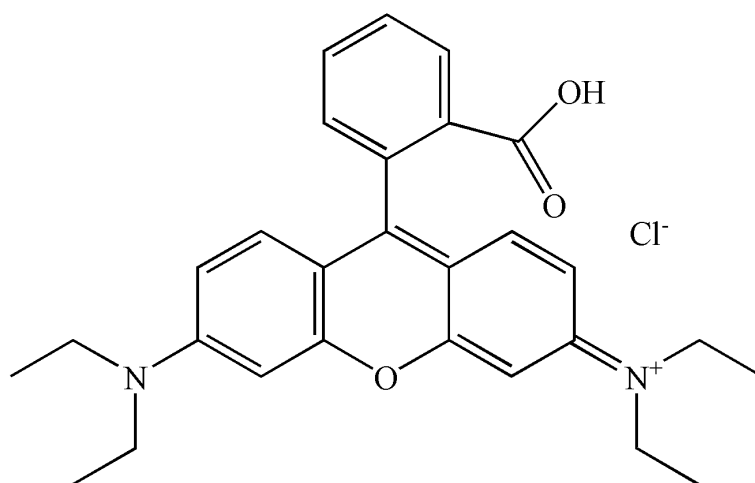

**Figure S1.** The structure of RhB.

**Table S1.** Comparison of different modified electrodes for the detection of RhB.

| Electrode                  | Detection limit [ $\mu\text{g L}^{-1}$ ] | References |
|----------------------------|------------------------------------------|------------|
| Bare GCE                   | 2.93                                     | [1]        |
| Cu@carbon sphere/GCE       | 47.9                                     | [2]        |
| $\beta$ -CD-AuNPs/HCNS/GCE | 0.96                                     | This work  |

[1] L. Yu, Y. Mao and L. Qu, *Food Anal. Method.*, 2013, **6**, 1665.

[2] J. Sun, T. Gan, Y. Li, Z. Shi and Y. Liu, *J. Electroanal. Chem.*, 2014, **724**, 87.
